# Supplementary material for: Electrolyte engineering for effective seawater splitting based on manganese iron chromium layered triple hydroxides as novel bifunctional electrocatalysts
Source: Royal Society of Chemistry journal article supplement (doi:10.1039/d2ta09984e), 2023-01-01
Supplement: d2ta09984e1.pdf [file d2ta09984e1.pdf]

## **Electronic Supplementary Information**

### **Electrolyte Engineering for Effective Seawater Splitting Based on Manganese Iron Chromium Layered Triple Hydroxides as Novel Bifunctional Electrocatalysts**

Santanu Pal,<sup>a,b</sup> Koji Shimizu,<sup>c</sup> Sakila Khatun,<sup>a,b</sup> Soumen Singha,<sup>d</sup> Satoshi Watanabe,<sup>c\*</sup>  
Poulomi Roy<sup>a,b\*</sup>

<sup>a</sup>Materials Processing & Microsystems Laboratory, CSIR – Central Mechanical Engineering Research Institute (CMERI), Mahatma Gandhi Avenue, Durgapur 713209, West Bengal, India

<sup>b</sup>Academy of Scientific and Innovative Research (AcSIR), CSIR- Human Resource Development Centre (CSIR-HRDC), Ghaziabad, Uttar Pradesh- 201 002, India.

E-mail: [poulomiroy@yahoo.com](mailto:poulomiroy@yahoo.com)

<sup>c</sup>Department of Materials Engineering, The University of Tokyo, 7-3-1 Hongo, Bunkyo-ku, Tokyo 113-8656, Japan

E-mail: [watanabe@cello.t.u-tokyo.ac.jp](mailto:watanabe@cello.t.u-tokyo.ac.jp)

<sup>d</sup>Department of Physics, Jadavpur University, Kolkata-700032, India

| Figures/<br>Tables | Contents                                                                                                                                                                                                                                                                      | Page<br>Number |
|--------------------|-------------------------------------------------------------------------------------------------------------------------------------------------------------------------------------------------------------------------------------------------------------------------------|----------------|
| <b>Figures</b>     |                                                                                                                                                                                                                                                                               |                |
| <b>Fig. S1</b>     | Enlarged view of XRD peak at 11.6°                                                                                                                                                                                                                                            | <b>5</b>       |
| <b>Fig. S2</b>     | Model structure of MnFeCr triple hydroxide                                                                                                                                                                                                                                    | <b>5</b>       |
| <b>Fig. S3</b>     | FTIR spectra for MF-LDH and MFC LTH samples.                                                                                                                                                                                                                                  | <b>6</b>       |
| <b>Fig. S4</b>     | FESEM images of MF (a), MFC-1 (b), MFC-2 (c) and MFC-3 (d) samples.                                                                                                                                                                                                           | <b>7</b>       |
| <b>Fig. S5</b>     | High resolution XPS analysis of (a) Mn 2p, (b) Fe 2p, (c) Cr 2p, (d) O 1s and (e) C 1s for MF and MFC-2 samples.                                                                                                                                                              | <b>8</b>       |
| <b>Fig. S6</b>     | Comaprison of LSV and SCV plot for (a) MF LDH, (b) MFC-1, (c) MFC-2, (d) MFC-3, (e) RuO <sub>2</sub> and (f) bare NF electrocatalysts showing their performance towards OER activity.                                                                                         | <b>9</b>       |
| <b>Fig. S7</b>     | (a) PEIS taken at 1.518 V vs RHE from 100 kHz – 0.1 Hz for OER of as prepared LDH, LTHs, RuO <sub>2</sub> and NF in 1M KOH electrolyte medium. (b) Bode Phase angle plot and (c) Bode plot of electrocatalysts taken in 1M KOH electrolyte of corresponding electrocatalysts. | <b>9</b>       |
| <b>Fig. S8</b>     | (a-d) Cyclic voltammogram plots in non-Faradic region for (a) MF, (b) MFC-1, (c) MFC-2 and (d) MFC-3 in 1M KOH electrolyte and (e) calculated C <sub>dl</sub> values. (f) ECSA values of corresponding LDH and LTHs.                                                          | <b>10</b>      |
| <b>Fig. S9</b>     | Mass loading optimization of MF: (a) Oxidation peak area, (b) iR drop uncompensated LSV, (c) charge associated to oxidation and (d) calculated TOF of MF-LDH at different mass loading.                                                                                       | <b>11</b>      |
| <b>Fig. S10</b>    | (a) The side view of the H <sub>ad</sub> O <sub>bri</sub> +OH <sub>ad</sub> structure in the MF(011) surface. (b) The surface sites of the corresponding structure from the top view.                                                                                         | <b>13</b>      |
| <b>Fig. S11</b>    | The side views of (a) O <sub>bri</sub> +OH <sub>ad</sub> , (b) H <sub>ad</sub> O <sub>bri</sub> +O <sub>ad</sub> , (c) O <sub>bri</sub> +O <sub>ad</sub> , and (d) OH <sub>bri</sub> in the MF(011) surface.                                                                  | <b>14</b>      |
| <b>Fig. S12</b>    | (a) The side view of the H <sub>ad</sub> O <sub>bri</sub> +OH <sub>ad</sub> structure in the MFC-2 (011) surface. (b) The surface sites of the corresponding structure from the top view.                                                                                     | <b>15</b>      |
| <b>Fig. S13</b>    | The side views of (a) O <sub>bri</sub> +OH <sub>ad</sub> , (b) H <sub>ad</sub> O <sub>bri</sub> +O <sub>ad</sub> , (c) O <sub>bri</sub> +O <sub>ad</sub> , and (d) OH <sub>bri</sub> in the MFC-2(011) surface.                                                               | <b>16</b>      |
| <b>Fig. S14</b>    | The intermediate structures of OER in the MF(011) surface using the H <sub>ad</sub> O <sub>bri</sub> +OH <sub>ad</sub> termination.                                                                                                                                           | <b>17</b>      |
| <b>Fig. S15</b>    | The intermediate structures of OER in the MFC-2(011) surface using the H <sub>ad</sub> O <sub>bri</sub> +OH <sub>ad</sub> termination.                                                                                                                                        | <b>17</b>      |
| <b>Fig. S16</b>    | The side views of (a) MF(012) and (b) MFC-2(012) slab models. (c) Calculated Gibbs free energy profiles of OER via the Mars van Krevelen mechanism under alkaline condition. The intermediate adsorbed structures of (d) MF(012) and (e) MFC-2(012).                          | <b>18</b>      |
| <b>Fig. S17</b>    | (a) Chronoamperometry study of MFC-2 for OER in alkaline real seawater and (b) corresponding LSV plots before and after stability test.                                                                                                                                       | <b>19</b>      |

|                 |                                                                                                                                                                                                                                                                                                                                                                                                                                                                             |           |
|-----------------|-----------------------------------------------------------------------------------------------------------------------------------------------------------------------------------------------------------------------------------------------------------------------------------------------------------------------------------------------------------------------------------------------------------------------------------------------------------------------------|-----------|
| <b>Fig. S18</b> | (a) Bode plot and (b) Phase angle plot of MFC-2 LTH in presence and absence of different corrosion inhibitors in 1M KOH + 1M NaCl electrolyte.                                                                                                                                                                                                                                                                                                                              | <b>19</b> |
| <b>Fig. S19</b> | LSV plots of MFC-2 for HER in 1M KOH + 1M NaCl with and without inhibitors showing no noticeable influences.                                                                                                                                                                                                                                                                                                                                                                | <b>20</b> |
| <b>Fig. S20</b> | Iodometry test confirming a) no formation of $\text{ClO}^-$ due to CER in presence of carbonate inhibitor and b) formation of $\text{ClO}^-$ as indicated by yellow coloration in absence of carbonate in real seawater after chronopotentiometry test.                                                                                                                                                                                                                     | <b>20</b> |
| <b>Fig. S21</b> | Comparative bar diagram showing concentration of oxidants including hypochlorite determined by DPD test in colorimetric method during seawater electrolysis in presence and absence of inhibitor at certain intervals of long run stability test. The calibration has been made based on standard permanganate solution.                                                                                                                                                    | <b>21</b> |
| <b>Fig. S22</b> | XPS spectra of (a) Mn 2p, (b) Fe 2p, (c) Cr 2p and (d) O 1s after prolonged stability for OER in seawater with and without inhibitor.                                                                                                                                                                                                                                                                                                                                       | <b>21</b> |
| <b>Fig. S23</b> | Raman Spectroscopy of MFC-2 LTH before and after prolonged stability for OER in seawater with and without inhibitor.                                                                                                                                                                                                                                                                                                                                                        | <b>22</b> |
| <b>Fig. S24</b> | (a) A thin layer model of FeOOH generated from bulk structural information provided by the Materials Project database (mp-24200). (b) Calculated Gibbs free energy profile of OER via the Mars van Krevelen mechanism under alkaline condition and (c) the intermediate adsorbed structures. $2 \times 2 \times 1$ sampling meshes were used for the Brillouin-zone integration while the other computational conditions were the same as those described in the main text. | <b>23</b> |
| <b>Fig. S25</b> | (a) A thin layer model of MnOOH generated from bulk structural information provided by the Materials Project database (mp-1002573). (b) Calculated Gibbs free energy profile of OER under alkaline condition and (c) the intermediate adsorbed structures. $2 \times 2 \times 1$ sampling meshes were used for the Brillouin-zone integration while the other computational conditions were the same as those described in the main text.                                   | <b>24</b> |

| <b>Tables</b>    |                                                                                                                                                                     |           |
|------------------|---------------------------------------------------------------------------------------------------------------------------------------------------------------------|-----------|
| <b>Table S1</b>  | Reaction parameters and precursor concentrations used for developing LDH and LTHs.                                                                                  | <b>25</b> |
| <b>Table S2</b>  | Elemental information for developed LDH and LTHs based on the EDX analysis.                                                                                         | <b>25</b> |
| <b>Table S3</b>  | Electrochemical Impedance Spectroscopy (EIS) parameters of fitted data of various electrocatalysts at 287 mV overpotential for OER process in 1M KOH electrolyte.   | <b>25</b> |
| <b>Table S4</b>  | Fitted simulation EIS result with $R_s$ , $R_c$ , $R_{ct}$ , $Y$ and $n$ parameters of MFC-2 in presence and absence of inhibitors in 1M KOH + 1M NaCl electrolyte. | <b>26</b> |
| <b>Table S5</b>  | Potentiodynamic polarization (PD) parameters of MFC-2 LTH in different electrolyte solutions.                                                                       | <b>26</b> |
| <b>Table S6</b>  | Fitted data of EIS spectroscopy of various electrolyte at 230 mV overpotential for HER process electrocatalysts in 1M KOH.                                          | <b>27</b> |
| <b>Table S7</b>  | Comparison of $C_{dl}$ , ECSA and TOF of prepared electrocatalysts in 1M KOH medium.                                                                                | <b>27</b> |
| <b>Table S8</b>  | pH monitoring over the stability periods in alkaline seawater electrolyte with and without inhibitor.                                                               | <b>27</b> |
| <b>Table S9</b>  | Comparative electrocatalytic performances of recently developed electrocatalysts for seawater splitting.                                                            | <b>28</b> |
| <b>Table S10</b> | ICP-MS analysis of electrolytes after stability test of MFC-2 at current density of 300 mA cm <sup>-2</sup> .                                                       | <b>29</b> |
| <b>Table S11</b> | Calculated Gibbs free energy changes of OER under alkaline condition. The asterisk marks indicate the reactions via the Mars van Krevelen mechanism.                | <b>30</b> |

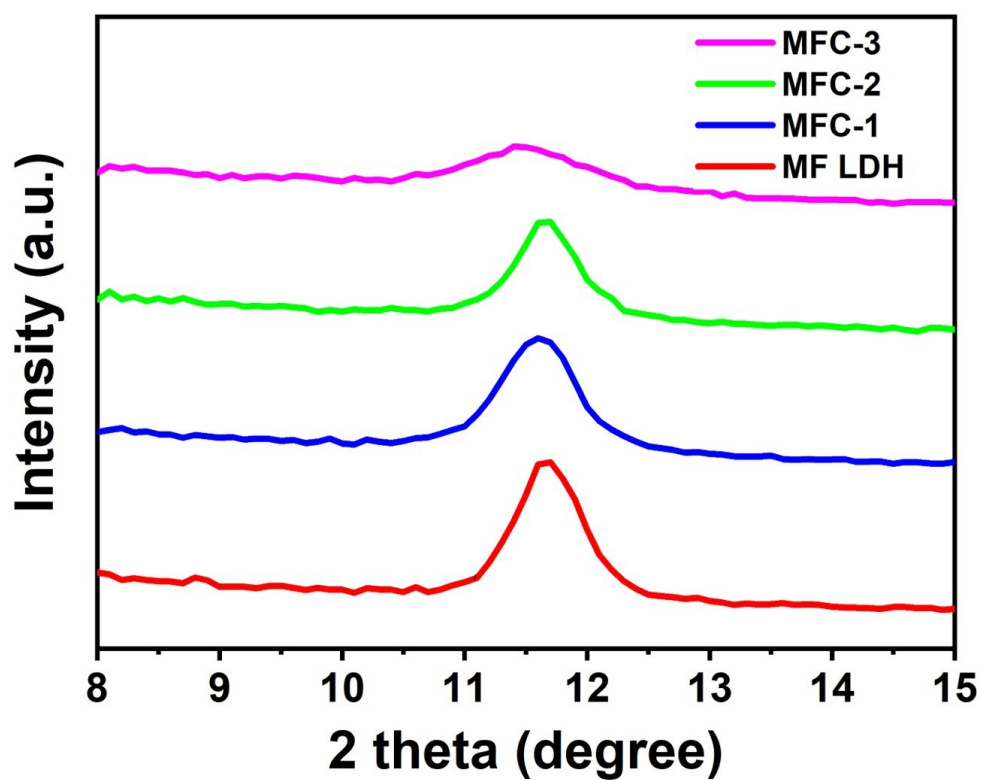

Figure S1. Enlarged view of XRD peak at  $11.6^\circ$ .

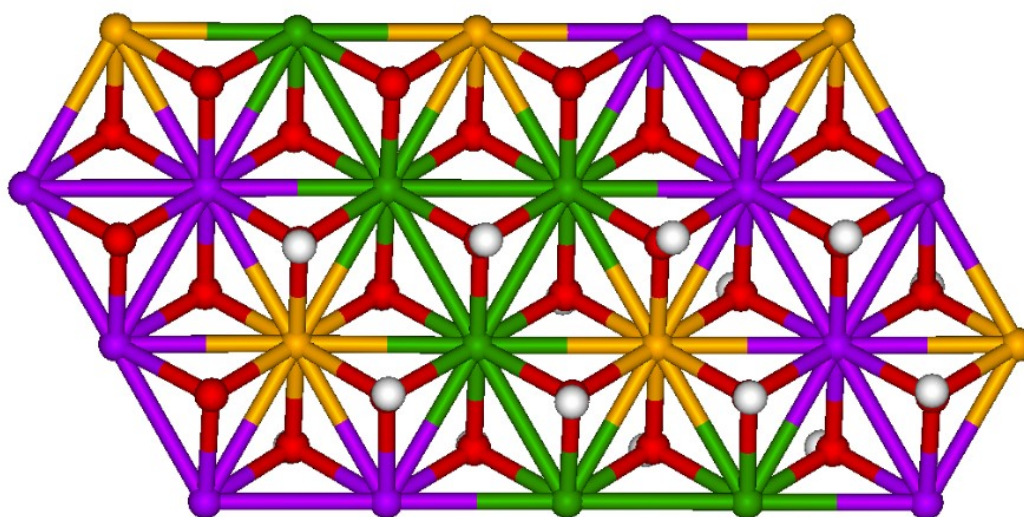

Figure S2. layered Structure of MnFeCr triple hydroxide (Fe: Orange, Mn: Pink, Cr: Green, O: Red and H: White).

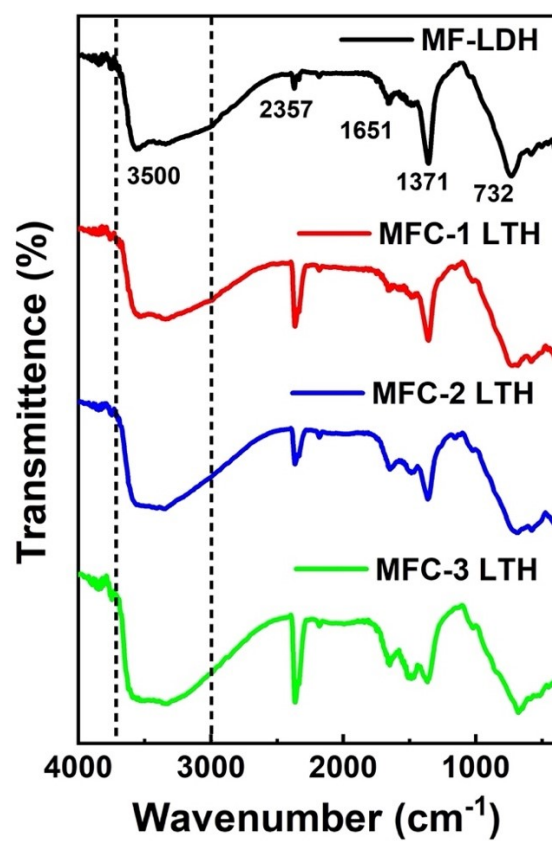

**Figure S3.** FTIR spectra for MF-LDH and MFC LTH samples.

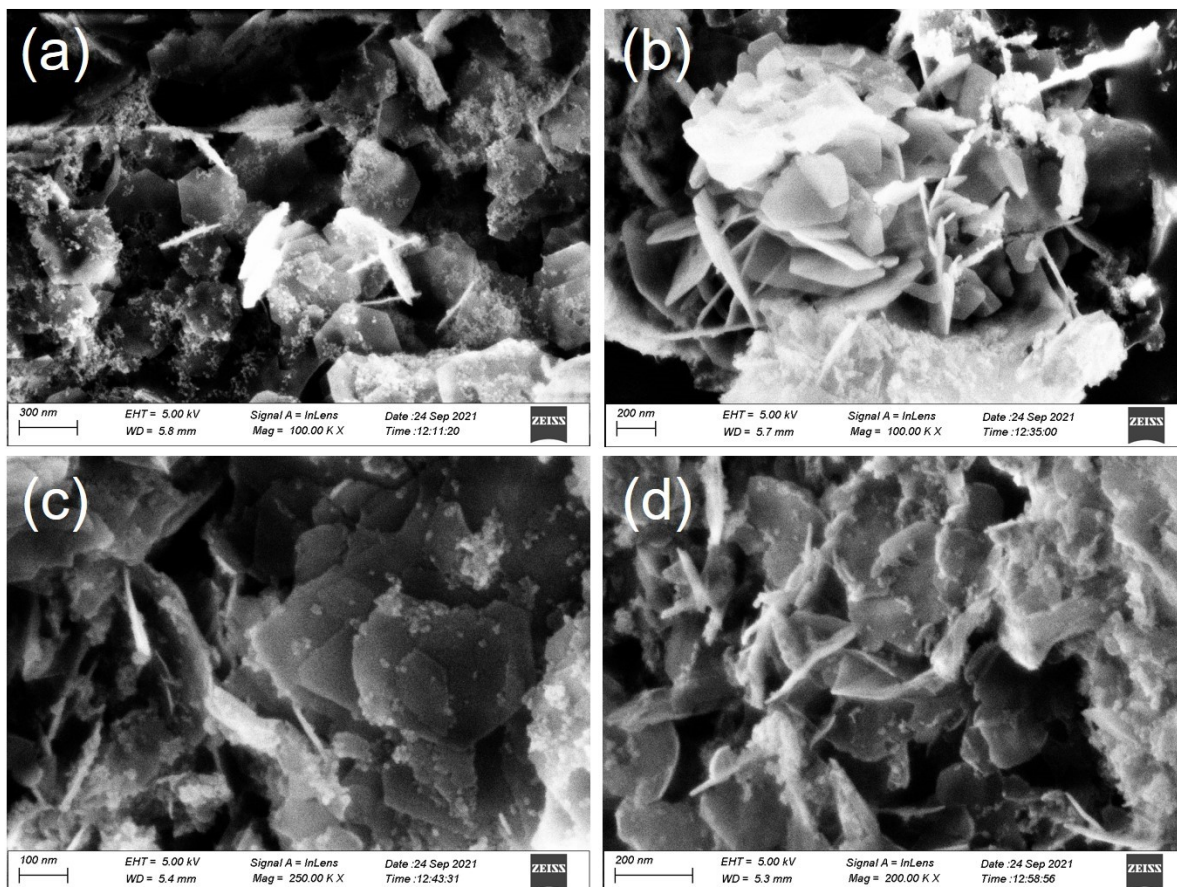

**Figure S4.** FESEM images of MF (a), MFC-1 (b), MFC-2 (c) and MFC-3 (d) samples.



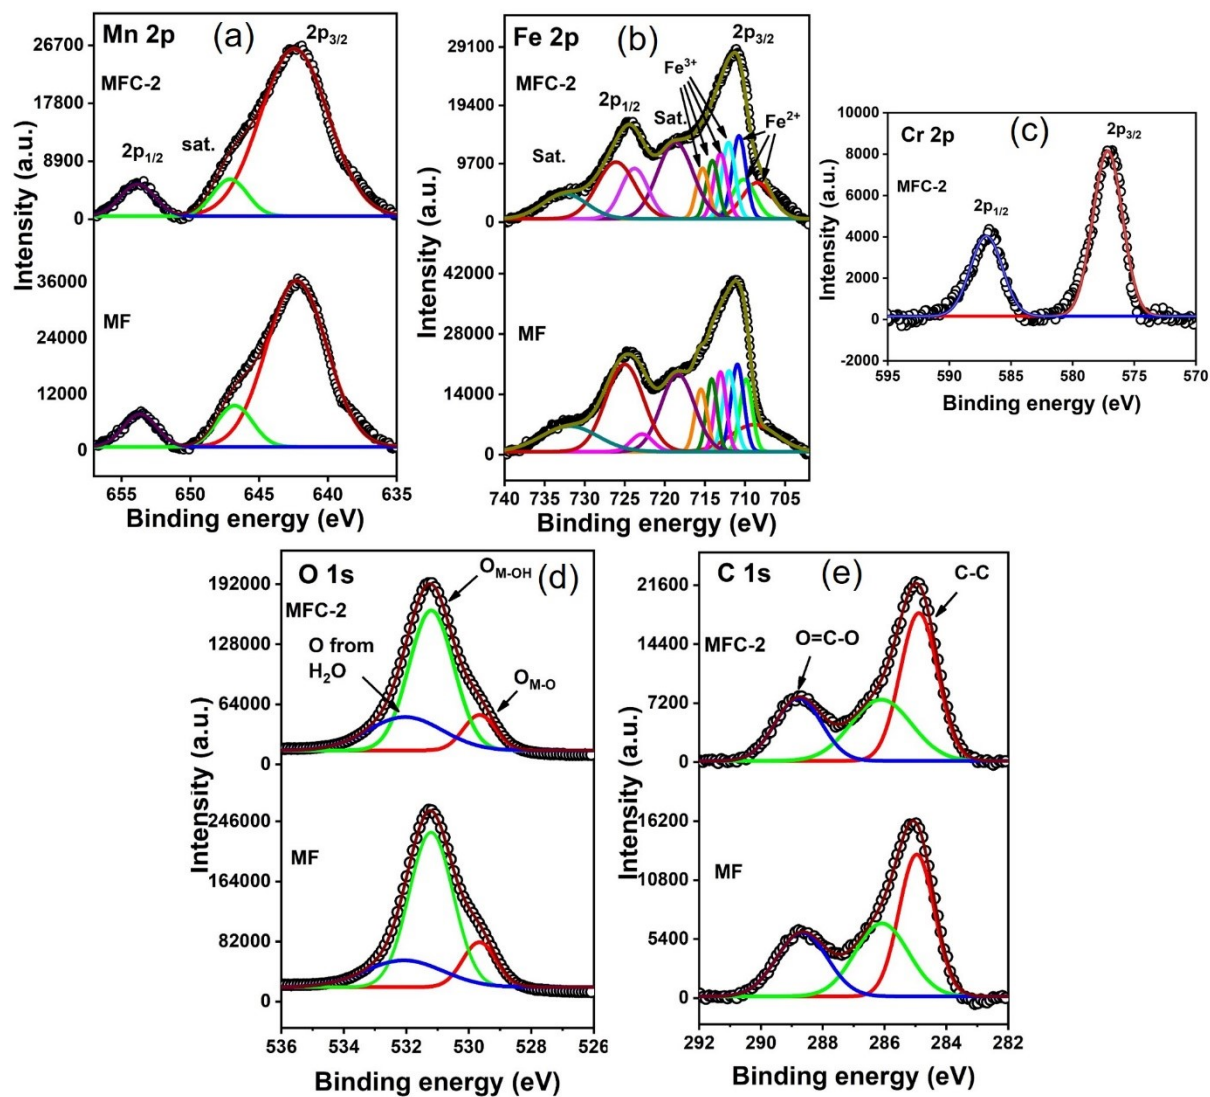

**Figure S5.** High resolution XPS analysis of (a) Mn  $2p$ , (b) Fe  $2p$ , (c) Cr  $2p$ , (d) O  $1s$  and (e) C  $1s$  for MF and MFC-2 samples.



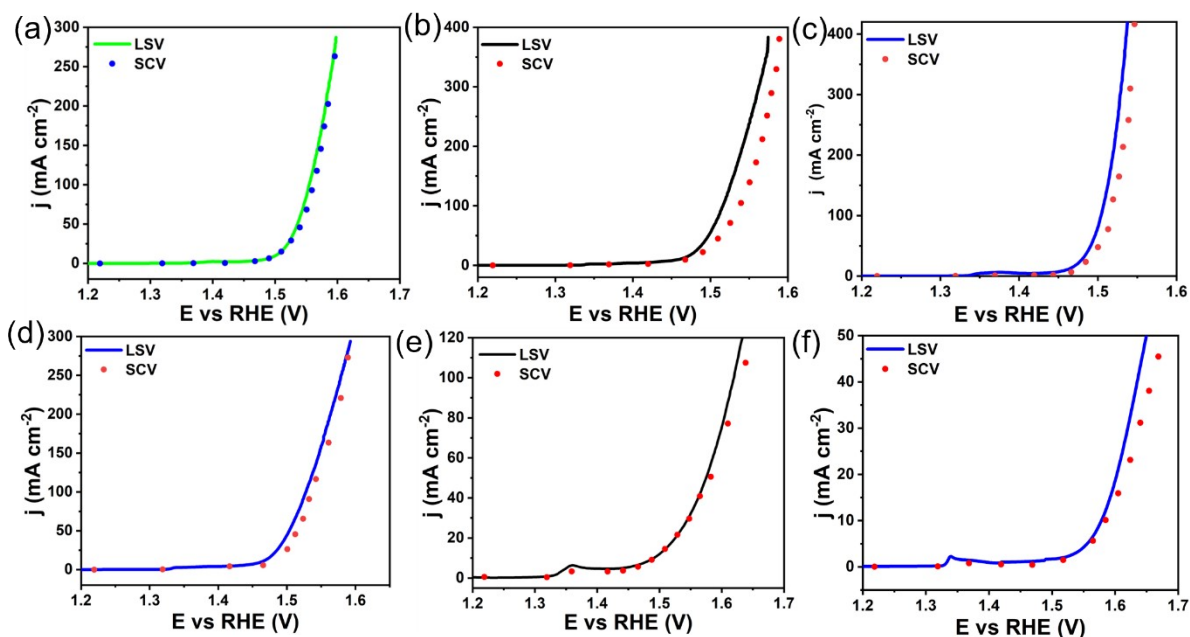

**Figure S6.** Comparison of LSV and SCV plot for (a) MF LDH, (b) MFC-1, (c) MFC-2, (d) MFC-3, (e) RuO<sub>2</sub> and (f) bare NF electrocatalysts showing their performance towards OER activity.

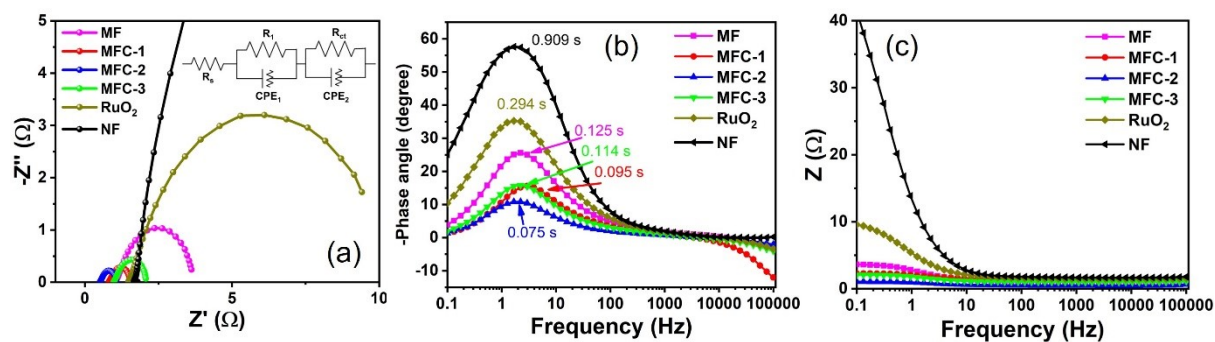

**Figure S7.** (a) PEIS taken at 1.518 V vs RHE from 100 kHz – 0.1 Hz for OER of as prepared LDH, LTHs, RuO<sub>2</sub> and NF in 1M KOH electrolyte medium. (b) Bode Phase angle plot and (c) Bode plot of electrocatalysts taken in 1M KOH electrolyte of corresponding electrocatalysts.

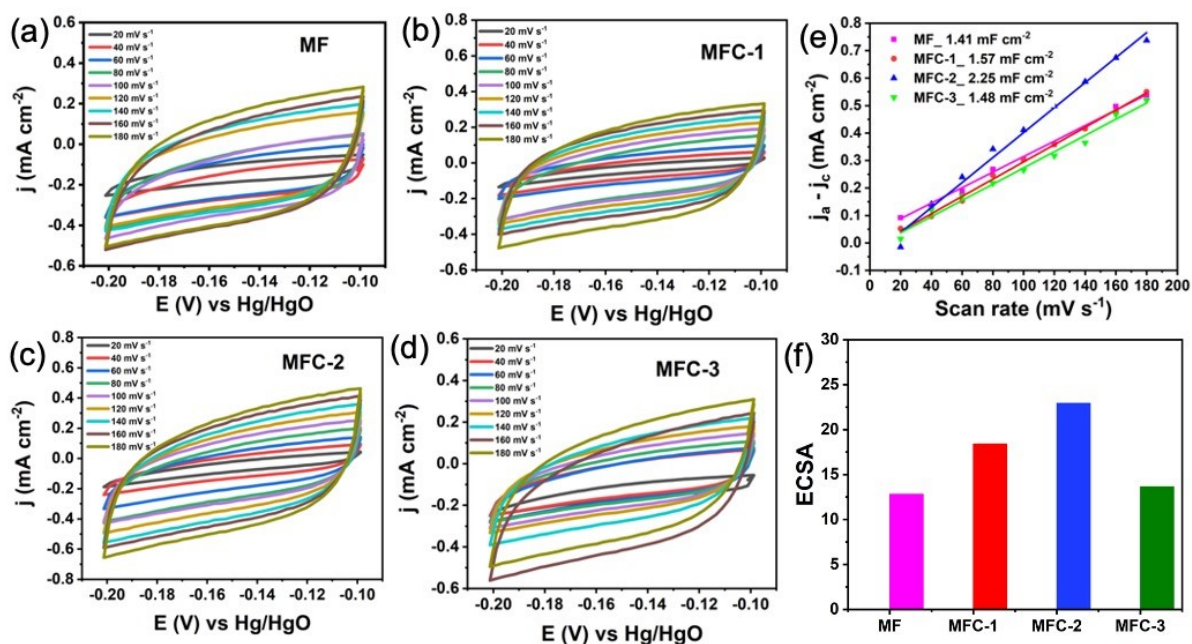

**Figure S8.** (a-d) Cyclic voltammogram plots in non-Faradic region for (a) MF, (b) MFC-1, (c) MFC-2 and (d) MFC-3 in 1M KOH electrolyte and (e) calculated  $C_{dl}$  values. (f) ECSA values of corresponding LDH and LTHs.

*Determination of specific capacitance:*

Capacitance = Charge/potential

Considering MF-LDH as an example, the area calculated from CV at scan rate of  $20 \text{ mV s}^{-1} = 1.37 \times 10^{-8} \text{ AV}$

$$\begin{aligned} \text{Associated charge} &= \text{integrated area} / (2 \times \text{scan rate}) \\ &= (1.37 \times 10^{-8} \text{ AV}) / (2 \times 0.02 \text{ V s}^{-1}) \\ &= 3.42 \times 10^{-7} \text{ A s} \\ &= 3.42 \times 10^{-7} \text{ C} \end{aligned}$$

$$\begin{aligned} \text{Specific capacitance} &= \text{charge} / (\text{area of electrode} \times \text{potential window}) \\ &= 110 \mu\text{F cm}^{-2} \end{aligned}$$

The  $C_s$  values for MFC-1, MFC-2 and MFC-3 LTHs were calculated in similar way.

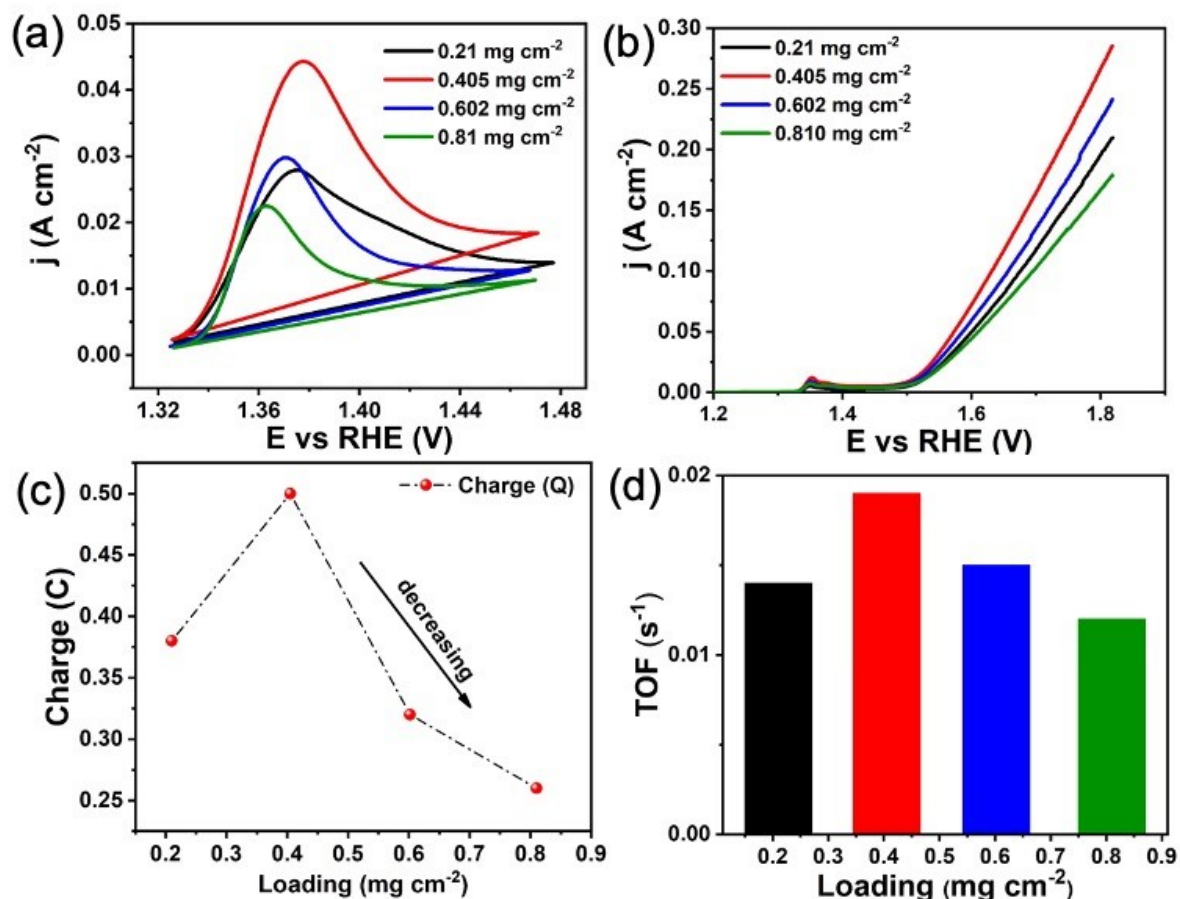

**Figure S9.** Mass loading optimization of MF: (a) Oxidation peak area, (b) iR drop uncompensated LSV, (c) charge associated to oxidation and (d) calculated TOF of MF-LDH at different mass loading at  $\eta_{300}$ .

#### TOF Calculations:

To calculate TOF, four different mass loading, 0.21, 0.405, 0.62 and 0.81 mg cm<sup>-2</sup> for electrocatalysts were considered to identify the optimum mass loading to attain near-perfect monolayer. As an example, we show here the mass loading optimization for MF-LDH and TOF calculation thereof.

First we evaluated the area under the oxidation peak indicating the participating active sites for TOF calculation and the number of electron involved during oxidation reaction of active species. In all cases, CVs were analysed at 10 mV s<sup>-1</sup> scan rate.

For MF-LDH with 0.21 mg cm<sup>-2</sup> mass loading:

Area under oxidation peak =  $3.8 \times 10^{-3}$  AV.

Hence, associated charge with oxidation peak of real active sites ( $Q_s$ ) =  $3.8 \times 10^{-3} \text{ AV}$   
 $/ 0.01 \text{ V s}^{-1} = 0.38 \text{ As} = 0.38 \text{ C}$

The number of transferred electrons are the equivalent to the no. of total active sites.

Hence, no. of moles of active sites that involved in OER ( $m$ ) =  $Q_s / F$

$$= 0.38 \text{ C} / 96485 \text{ C mol}^{-1}$$

TOF at 1.53 V (300 mV overpotential) vs. RHE for MF LDH with mass loading of 0.21  $\text{mg cm}^{-2}$  is

$$(\text{TOF})_{300 \text{ mV}} = 0.021 \text{ A} / [4 \times 96485 \text{ C mol}^{-1} \times (0.38 \text{ C} / 96485 \text{ C mol}^{-1})]$$

$$= 0.0138 \text{ s}^{-1}$$

The TOF for MF LDH was calculated with mass loading of 0.405  $\text{mg cm}^{-2}$ , 0.602  $\text{mg cm}^{-2}$  and 0.81  $\text{mg cm}^{-2}$  respectively and was found to be 0.019  $\text{s}^{-1}$ , 0.0158  $\text{s}^{-1}$  and 0.0127  $\text{s}^{-1}$ .

## MF(011)

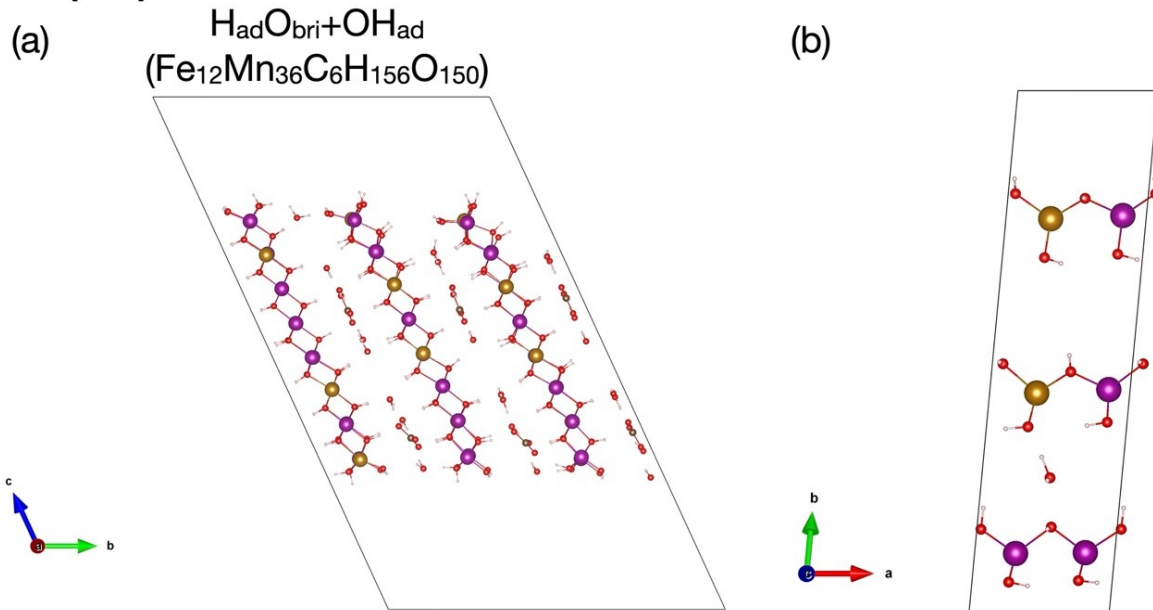

**Figure S10.** (a) The side view of the  $H_{ad}O_{bri}+OH_{ad}$  structure in the MF(011) surface. (b) The surface sites of the corresponding structure from the top view.

### MF(011)

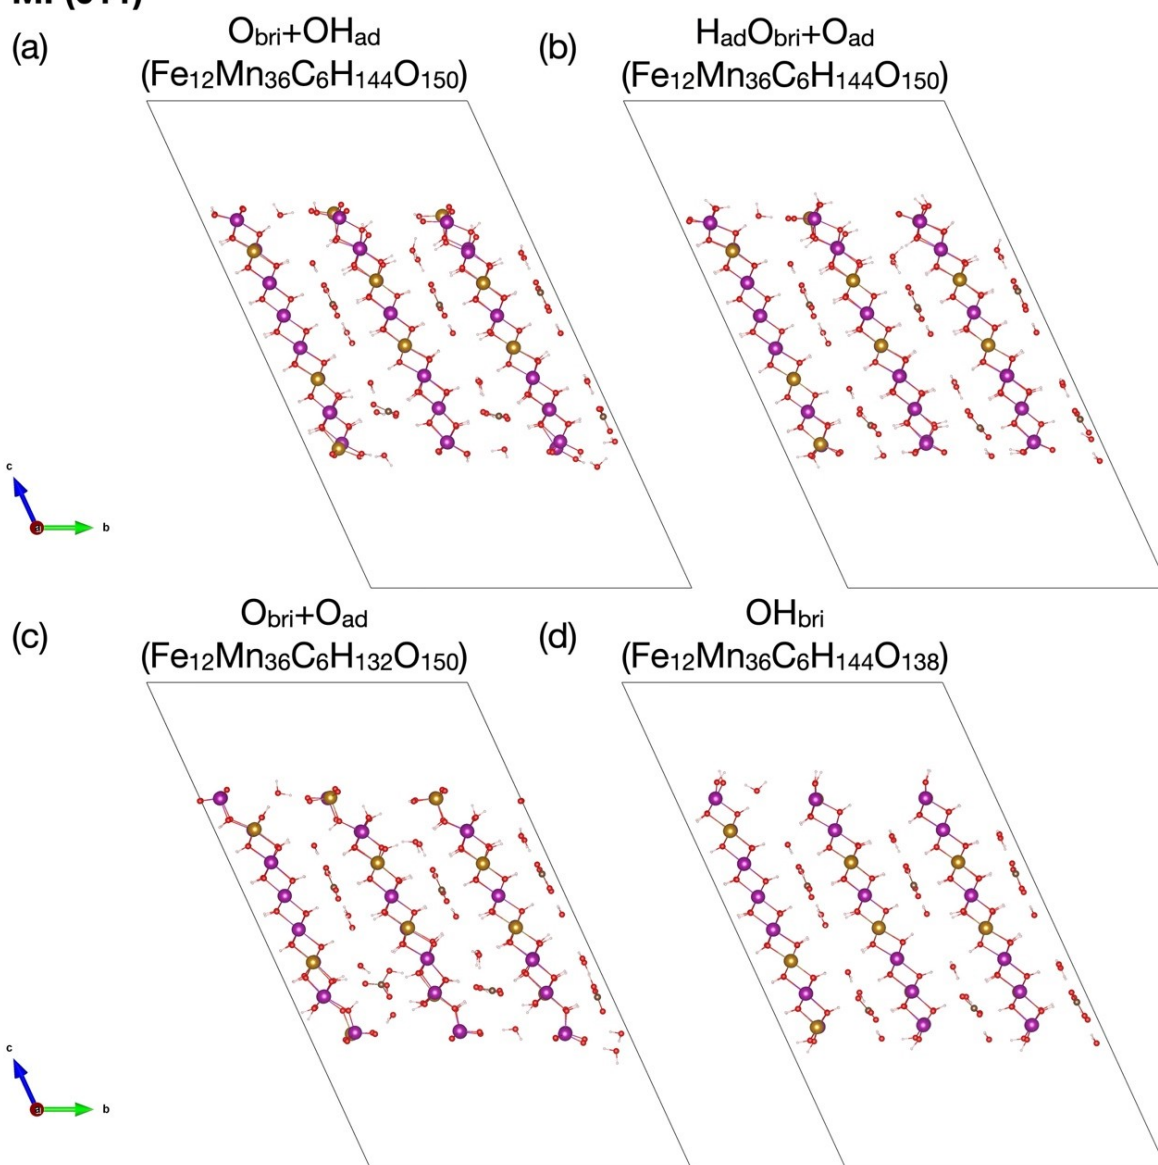

**Figure S11.** The side views of (a)  $O_{\text{bri}}+OH_{\text{ad}}$ , (b)  $H_{\text{ad}}O_{\text{bri}}+O_{\text{ad}}$ , (c)  $O_{\text{bri}}+O_{\text{ad}}$ , and (d)  $OH_{\text{bri}}$  in the MF(011) surface.



## MFC-2(011)

(a)  $H_{ad}O_{bri}+OH_{ad}$   
( $Fe_{12}Cr_{18}Mn_{18}C_6H_{156}O_{150}$ )

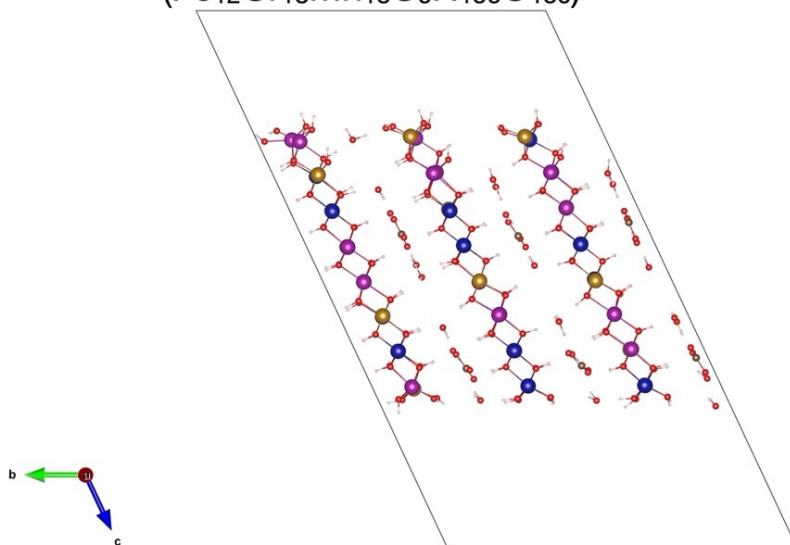

(b)

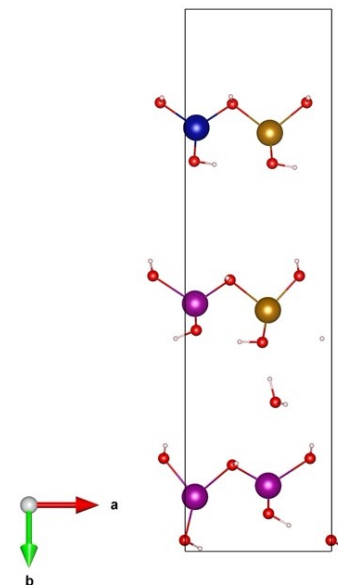

**Figure S12.** (a) The side view of the  $H_{ad}O_{bri}+OH_{ad}$  structure in the MFC-2(011) surface. (b) The surface sites of the corresponding structure from the top view.

### MFC-2(011)

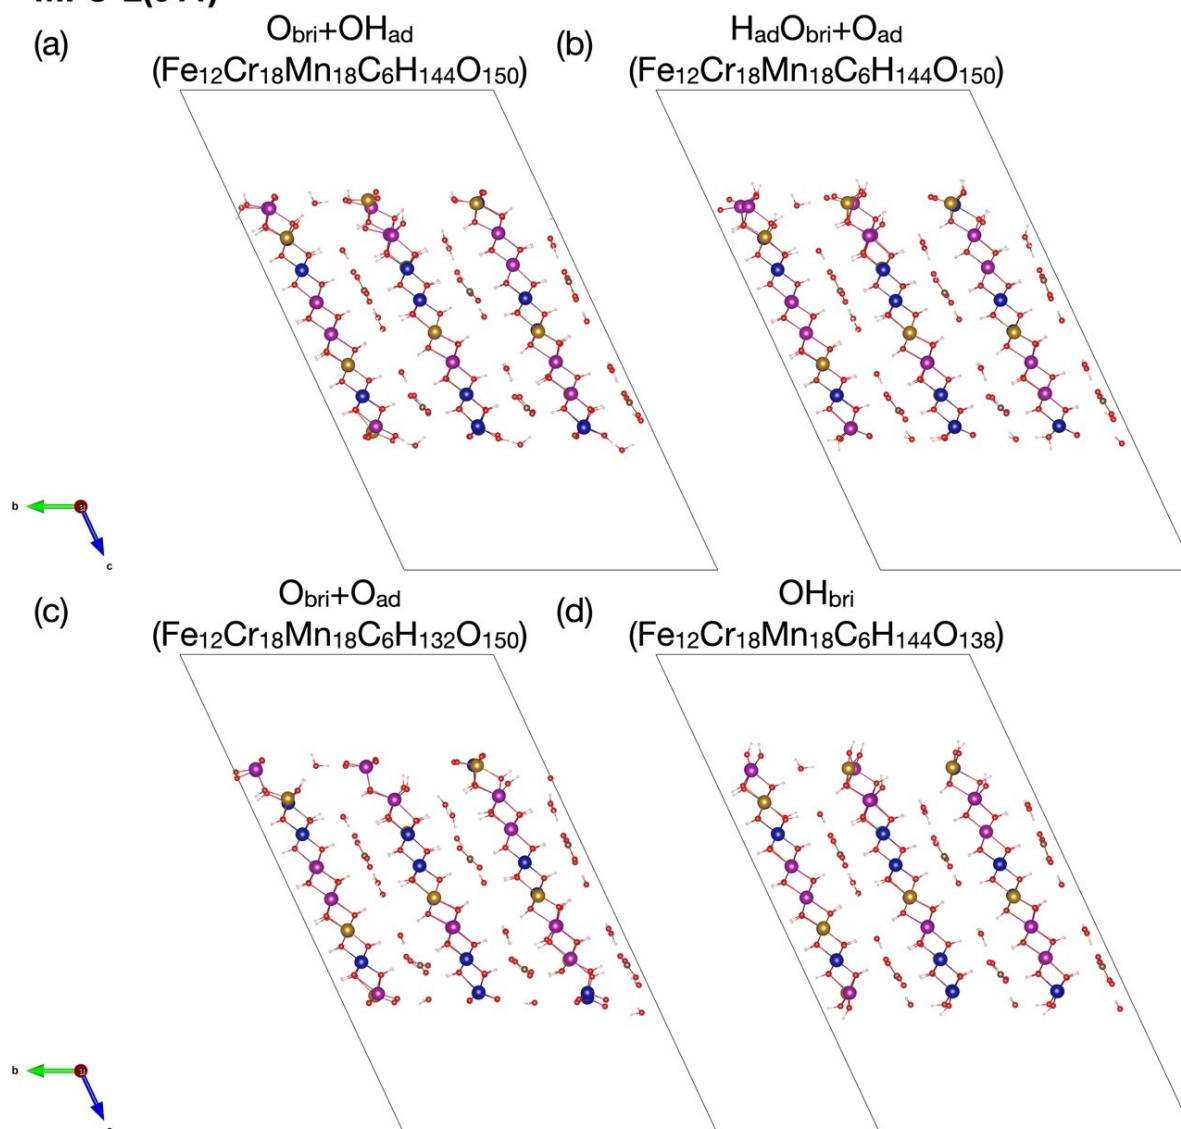

**Figure S13.** The side views of (a)  $O_{\text{bri}}+OH_{\text{ad}}$ , (b)  $H_{\text{ad}}O_{\text{bri}}+O_{\text{ad}}$ , (c)  $O_{\text{bri}}+O_{\text{ad}}$ , and (d)  $OH_{\text{bri}}$  in the MFC-2(011) surface.

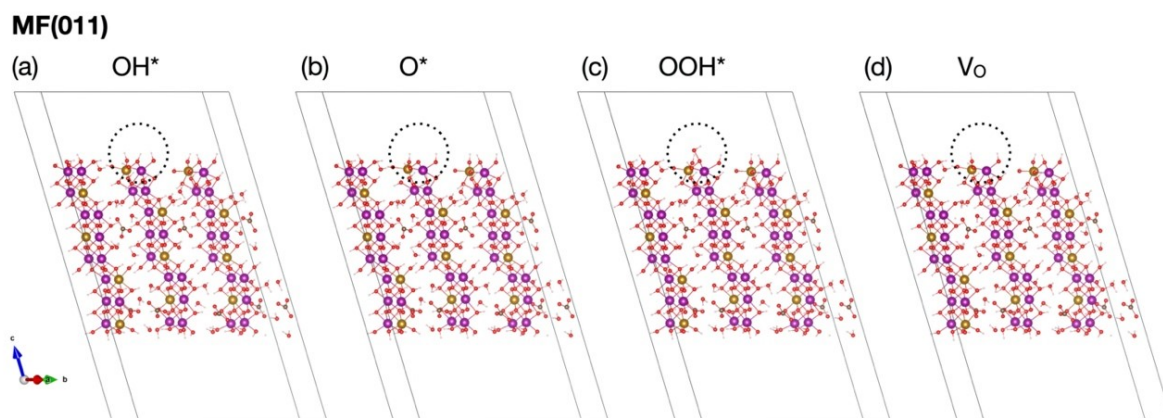

**Figure S14.** The intermediate structures of OER in the MF(011) surface using the  $\text{H}_{\text{ad}}\text{O}_{\text{bri}}+\text{OH}_{\text{ad}}$  termination.

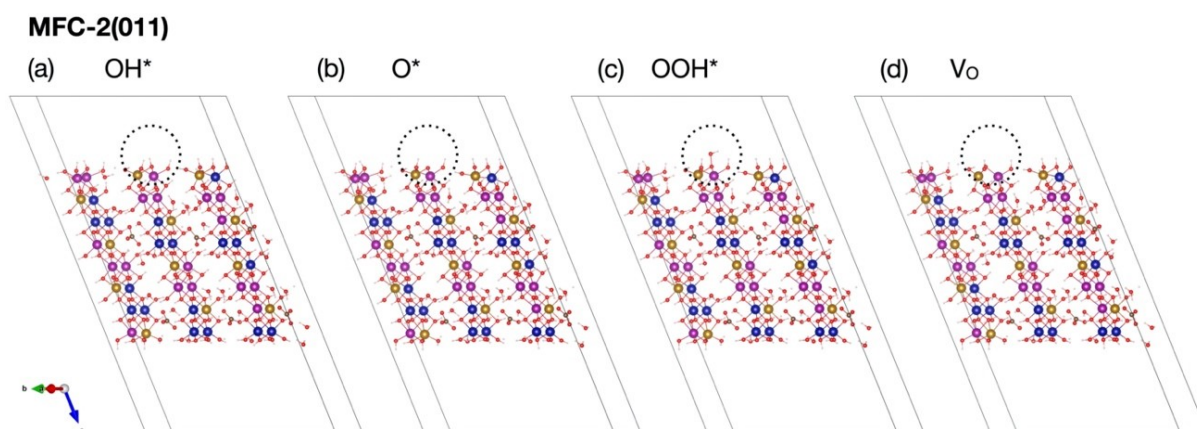

**Figure S15.** The intermediate structures of OER in the MFC-2(011) surface using the  $\text{H}_{\text{ad}}\text{O}_{\text{bri}}+\text{OH}_{\text{ad}}$  termination.

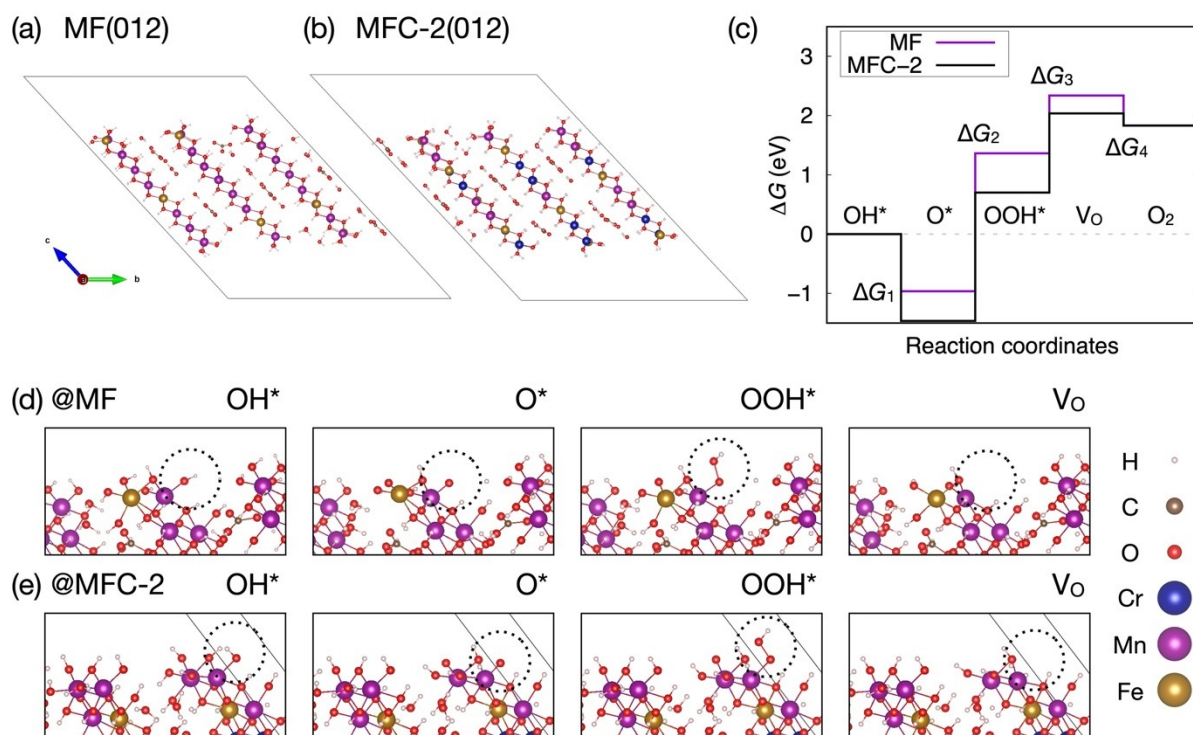

**Figure S16.** The side views of (a) MF(012) and (b) MFC-2(012) slab models. (c) Calculated Gibbs free energy profiles of OER via the Mars van Krevelen mechanism under alkaline condition. The intermediate adsorbed structures of (d) MF(012) and (e) MFC-2(012).

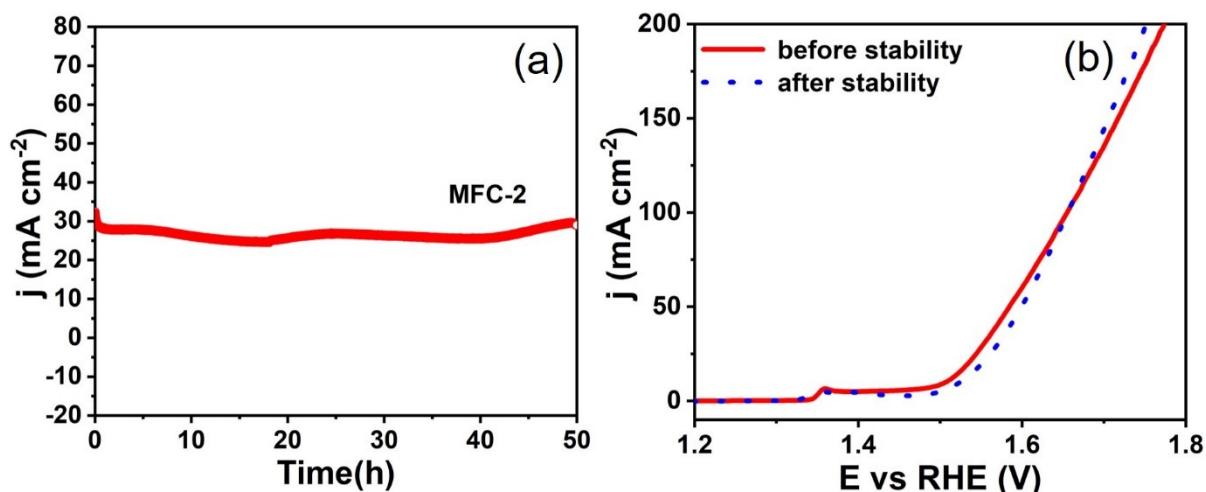

**Figure S17.** (a) Chronoamperometry study of MFC-2 for OER in alkaline real seawater and (b) corresponding LSV plots before and after stability test.

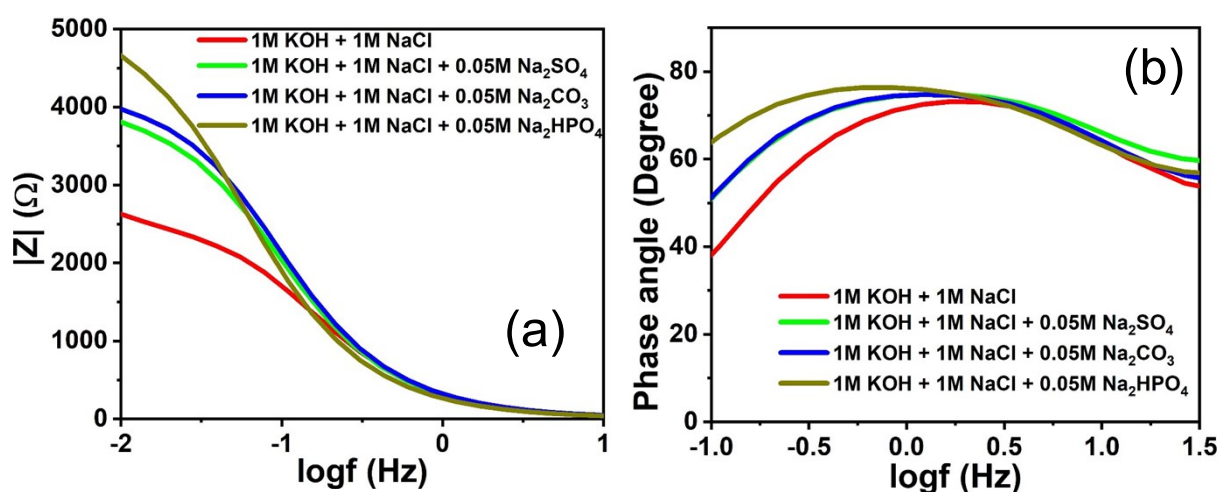

**Figure S18.** (a) Bode plot and (b) Phase angle plot of MFC-2 LTH in presence and absence of different corrosion inhibitors in 1M KOH + 1M NaCl electrolyte.

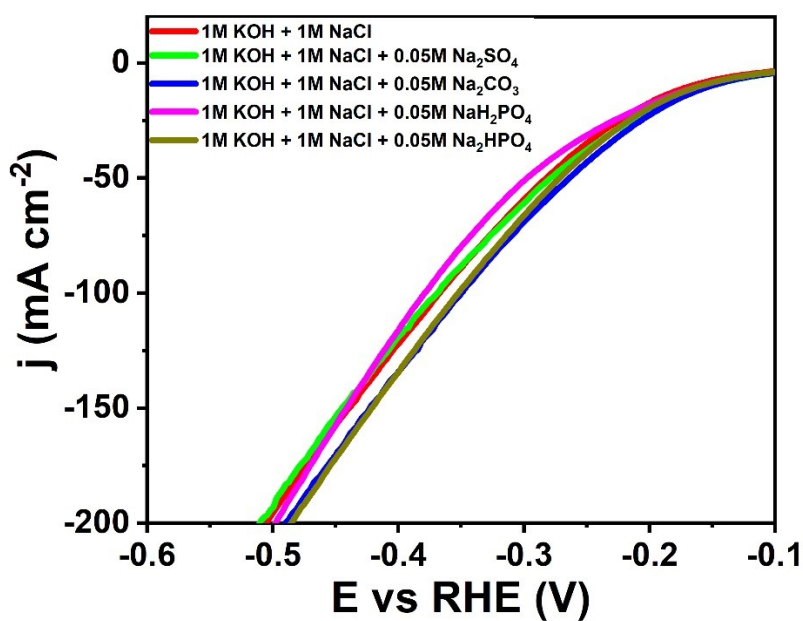

**Figure S19.** LSV plots of MFC-2 for HER in 1M KOH + 1M NaCl with and without inhibitors showing no noticeable influences.

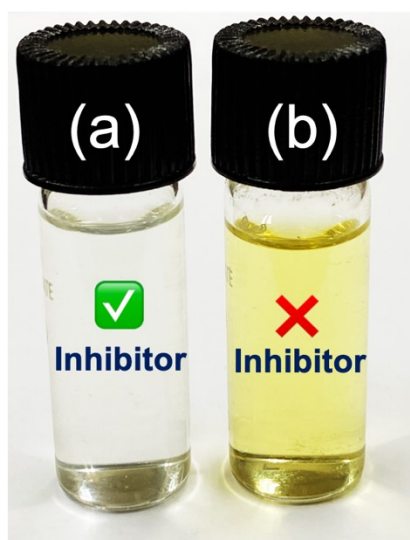

**Figure S20.** Iodometry test confirming a) no formation of ClO<sup>-</sup> due to CER in presence of carbonate inhibitor and b) formation of ClO<sup>-</sup> as indicated by yellow coloration in absence of carbonate in real seawater after chronopotentiometry test.



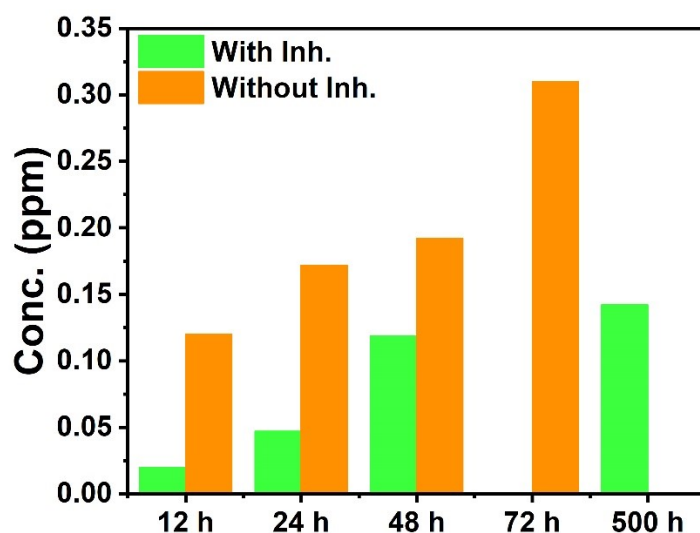

**Figure S21.** Comparative bar diagram showing concentration of oxidants including hypochlorite determined by DPD test in colorimetric method during seawater electrolysis in presence and absence of inhibitor at certain intervals of long run stability test. The calibration has been made based on standard permanganate solution.

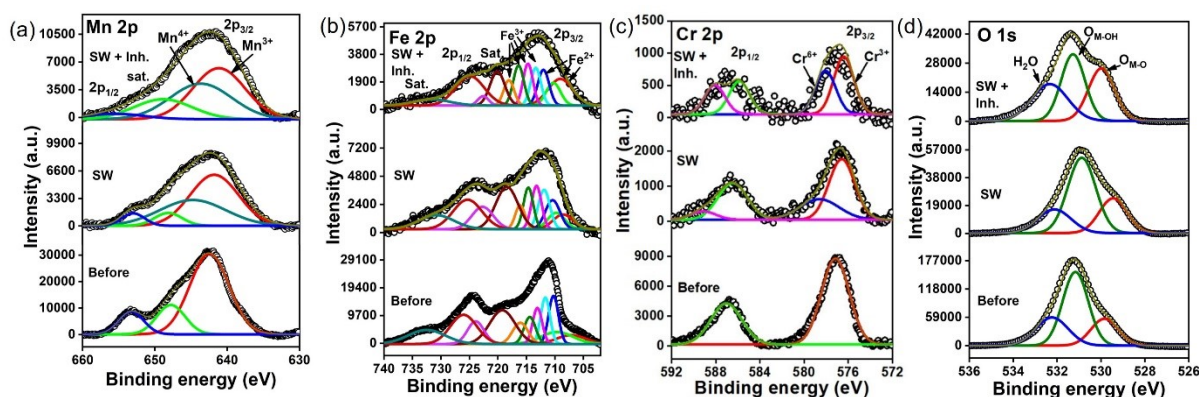

**Figure S22.** XPS spectra of (a) Mn 2p, (b) Fe 2p, (c) Cr 2p and (d) O 1s after prolonged stability for OER in seawater with and without inhibitor.

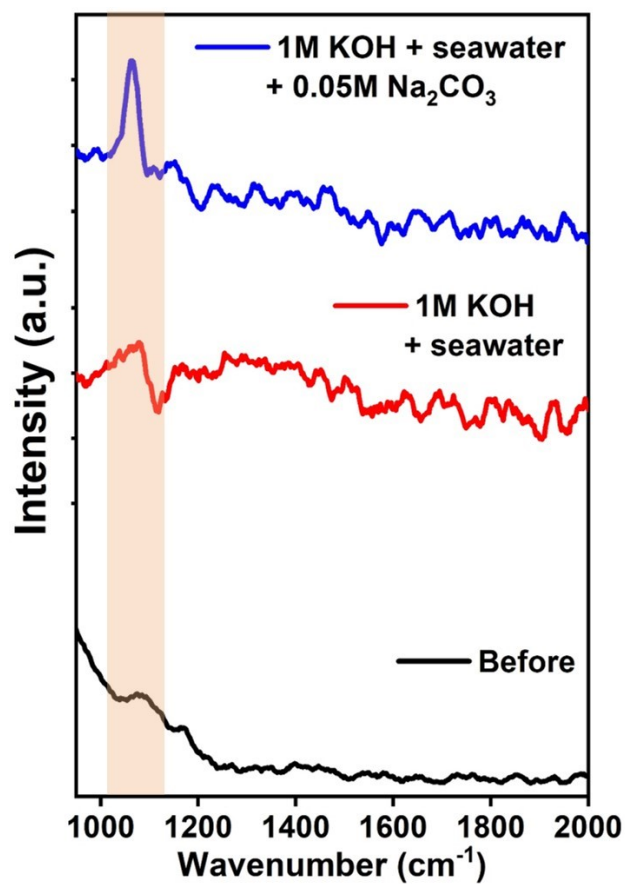

**Figure S23.** Raman Spectroscopy of MFC-2 LTH before and after prolonged stability for OER in seawater with and without inhibitor. The shaded area indicates presence of CO<sub>3</sub><sup>2-</sup>.

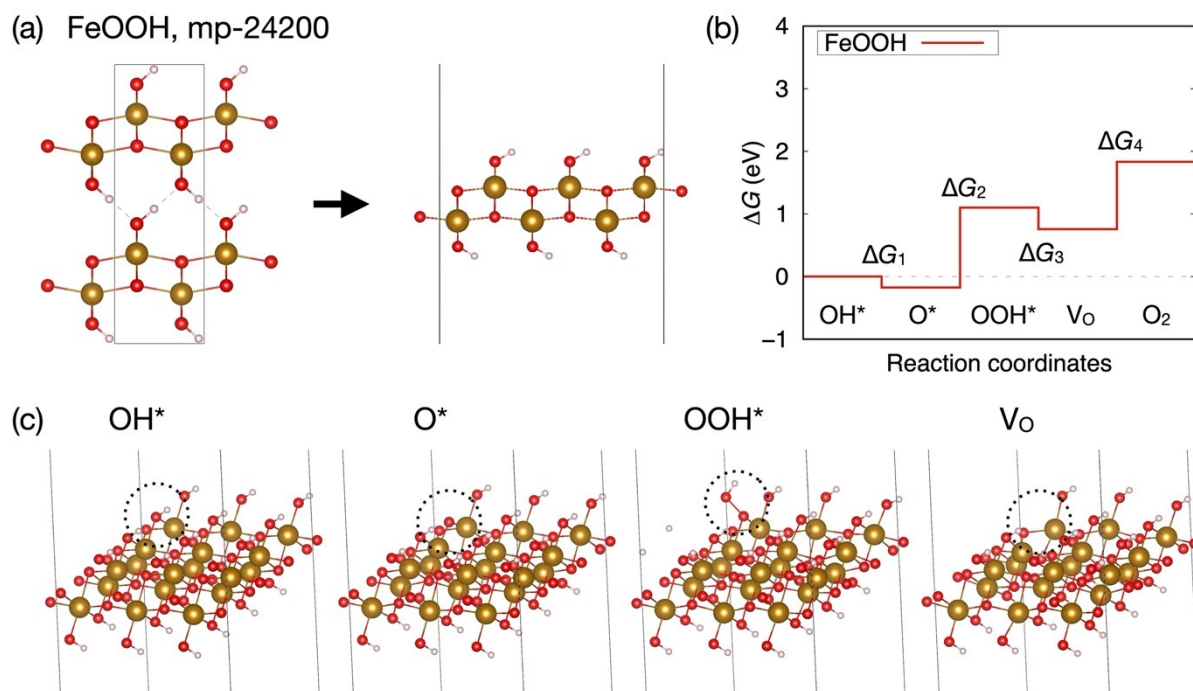

**Figure S24.** (a) A thin layer model of FeOOH generated from bulk structural information provided by the Materials Project database (mp-24200). (b) Calculated Gibbs free energy profile of OER via the Mars van Krevelen mechanism under alkaline condition and (c) the intermediate adsorbed structures.  $2 \times 2 \times 1$  sampling meshes were used for the Brillouin-zone integration while the other computational conditions were the same as those described in the main text.

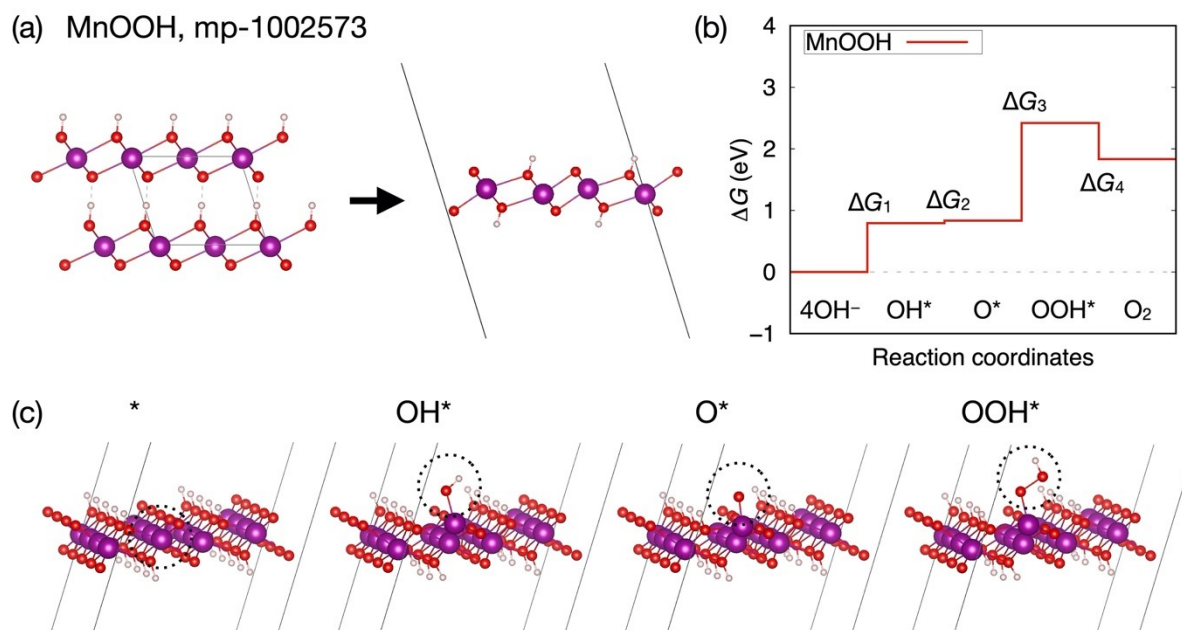

**Figure S25.** (a) A thin layer model of MnOOH generated from bulk structural information provided by the Materials Project database (mp-1002573). (b) Calculated Gibbs free energy profile of OER under alkaline condition and (c) the intermediate adsorbed structures.  $2 \times 2 \times 1$  sampling meshes were used for the Brillouin-zone integration while the other computational conditions were the same as those described in the main text.

**Table S1.** Reaction parameters and precursor concentrations used for developing LDH and LTHs.

| Samples | Reaction Temp/Time | Mn (mM) | Fe (mM) | Cr (mM) | Total Precursor Conc. (mM) |
|---------|--------------------|---------|---------|---------|----------------------------|
| MF      | 120 °C/16h         | 1       | 3       | --      | 4                          |
| MFC-1   |                    | 0.75    | 3       | 0.25    | 4                          |
| MFC-2   |                    | 0.5     | 3       | 0.5     | 4                          |
| MFC-3   |                    | 0.25    | 3       | 0.75    | 4                          |

**Table S2.** Elemental information for developed LDH and LTHs based on the EDX analysis.

| Samples | Mn (at%) | Fe (at%) | Cr (at%) | O (at%) |
|---------|----------|----------|----------|---------|
| MF      | 5        | 14.2     | 0        | 80.8    |
| MFC-1   | 3.9      | 19.1     | 1.8      | 75      |
| MFC-2   | 2.6      | 21.1     | 2.6      | 73.7    |
| MFC-3   | 1.6      | 20.1     | 5.5      | 72.8    |

**Table S3.** Electrochemical Impedance Spectroscopy (EIS) parameters of fitted data of various electrocatalysts in 1M KOH electrolyte at 287 mV overpotential for OER process.

| Sample           | R <sub>s</sub> (Ohm) | R <sub>ct</sub> (Ohm) |
|------------------|----------------------|-----------------------|
| MF               | 1.11                 | 2.88                  |
| MFC-1            | 0.83                 | 1.09                  |
| MFC-2            | 0.54                 | 0.55                  |
| MFC-3            | 0.98                 | 1.23                  |
| RuO <sub>2</sub> | 1.5                  | 9.2                   |

**Table S4.** Fitted simulation EIS result with  $R_s$ ,  $R_c$ ,  $R_{ct}$ ,  $Y$  and  $n$  parameters of MFC-2 in presence and absence of inhibitors in 1M KOH + 1M NaCl electrolyte.

| Electrolyte                                          | $R_s$<br>( $\Omega\text{cm}^2$ ) | $R_c$<br>( $\Omega\text{cm}^2$ ) | $Y_1$<br>( $\Omega^{-1}\text{cm}^{-2}$ ) | $n_1$ | $R_{ct}$<br>( $\Omega\text{cm}^2$ ) | $Y_2$<br>( $\Omega^{-1}\text{cm}^{-2}$ ) | $n_2$ |
|------------------------------------------------------|----------------------------------|----------------------------------|------------------------------------------|-------|-------------------------------------|------------------------------------------|-------|
| 1 M KOH + 1 M NaCl                                   | 0.65                             | 6.90                             | $1.20 \times 10^{-3}$                    | 0.83  | 1530                                | $1.28 \times 10^{-3}$                    | 0.90  |
| 1 M KOH + 1M NaCl + 0.05 M $\text{Na}_2\text{SO}_4$  | 0.73                             | 15.99                            | $0.928 \times 10^{-3}$                   | 0.805 | 2312                                | $1.09 \times 10^{-3}$                    | 0.93  |
| 1 M KOH + 1M NaCl + 0.05 M $\text{Na}_2\text{CO}_3$  | 0.85                             | 14.50                            | $0.846 \times 10^{-3}$                   | 0.81  | 2484                                | $1.05 \times 10^{-3}$                    | 0.91  |
| 1 M KOH + 1M NaCl + 0.05 M $\text{Na}_2\text{HPO}_4$ | 0.73                             | 19.28                            | $0.934 \times 10^{-3}$                   | 0.80  | 2912                                | $1.02 \times 10^{-3}$                    | 0.93  |

**Table S5.** Potentiodynamic polarization (PD) parameters of MFC-2 LTH in different electrolyte solutions.

| Electrolyte                                         | $E_{\text{corr}}$<br>(V) | $\beta_a$<br>(V/dec) | $\beta_c$<br>(V/dec) | $R_p$<br>( $\Omega.\text{cm}^2$ ) | Corrosion rate(mm/year) | $\eta$ (%) |
|-----------------------------------------------------|--------------------------|----------------------|----------------------|-----------------------------------|-------------------------|------------|
| 1M KOH + 1M NaCl                                    | 0.843                    | 2.8604               | 1.1868               | 809.75                            | 5.2273                  | ---        |
| 1M KOH + 1M NaCl + 0.05 M $\text{Na}_2\text{SO}_4$  | 0.861                    | 0.71996              | 0.26822              | 2584.8                            | 0.69549                 | 68.7       |
| 1M KOH + 1M NaCl + 0.05 M $\text{Na}_2\text{CO}_3$  | 0.857                    | 0.49235              | 0.24042              | 2690.75                           | 0.88123                 | 69.9       |
| 1M KOH + 1M NaCl + 0.05 M $\text{Na}_2\text{HPO}_4$ | 0.866                    | 2.6003               | 0.12209              | 2539.8                            | 0.2317                  | 68.1       |



**Table S6.** Fitted data of EIS spectroscopy of various electrocatalysts in 1M KOH electrolyte at 230 mV overpotential for HER process.

| Electrocatalyst | $R_s$ (ohm) | $R_{ct}$ (ohm) |
|-----------------|-------------|----------------|
| MFC-1           | 1.1         | 7.5            |
| MFC-2           | 0.56        | 3.08           |
| MFC-3           | 1.02        | 7.22           |
| MF              | 1.12        | 14.75          |
| Pt/C            | 1.4         | 11.87          |

**Table S7.** Comparison of  $C_{dl}$ , ECSA and TOF of developed electrocatalysts in 1M KOH medium.

| Catalyst | $C_{dl}$ at -0.15 V ( $mF\ cm^{-2}$ ) | ECSA  | TOF ( $s^{-1}$ ) at $\eta_{300}$ |
|----------|---------------------------------------|-------|----------------------------------|
| MF       | 1.41                                  | 12.8  | 0.019                            |
| MFC-1    | 1.57                                  | 18.42 | 0.047                            |
| MFC-2    | 2.25                                  | 22.93 | 0.106                            |
| MFC-2    | 1.48                                  | 13.67 | 0.042                            |

**Table S8.** pH monitoring over the stability periods in alkaline seawater electrolyte with and without inhibitor.

| Duration for stability study (h) | pH of electrolyte |                               |
|----------------------------------|-------------------|-------------------------------|
|                                  | Alkaline seawater | Alkaline seawater + Inhibitor |
| 0                                | 13.9              | 13.9                          |
| 5                                | 13.8              | 13.84                         |
| 24                               | 13.8              | 13.83                         |
| 48                               | 13.78             | 13.80                         |
| 72                               | 13.75             | --                            |
| 500                              | --                | 13.75                         |

**Table S9.** Comparative electrocatalytic performances of recently developed electrocatalysts for seawater splitting.

| Catalysts                                                                     | Electrolyt<br>e      | OER                                                  |                       | HER                                                  |                       | Overall                                                |                       | Ref |
|-------------------------------------------------------------------------------|----------------------|------------------------------------------------------|-----------------------|------------------------------------------------------|-----------------------|--------------------------------------------------------|-----------------------|-----|
|                                                                               |                      | $\eta_{OER}$<br>(mV) @ $J$<br>(mA.cm <sup>-2</sup> ) | Dura<br>bility<br>(h) | $\eta_{HER}$ (mV)<br>@ $J$<br>(mA.cm <sup>-2</sup> ) | Dura<br>bility<br>(h) | Cell<br>Voltage (V)<br>@ $J$<br>(mA.cm <sup>-2</sup> ) | Dura<br>bility<br>(h) |     |
| S-(NiFe)OOH                                                                   | 1M KOH + Seawater    | 300@100                                              | 100                   | --                                                   | --                    | --                                                     | --                    | S1  |
| NiFe LDH                                                                      | 0.1M KOH + 0.5M NaCl | 359@10                                               | 120                   | --                                                   | --                    | --                                                     | --                    | S2  |
| NiFe LDH                                                                      | 0.1M KOH + 0.5M NaCl | 270@10                                               | 100                   | --                                                   | --                    | --                                                     | --                    | S3  |
| NiFe hydroxide/Ni S <sub>x</sub> -Ni    Ni-NiO Cr <sub>2</sub> O <sub>3</sub> | 1M KOH + 0.5M NaCl   | 300@400                                              | 1000                  | 160@500                                              | 22                    | 2.08@400                                               | 500                   | S4  |
|                                                                               | 1M KOH + seawater    | --                                                   | --                    | --                                                   | --                    | 2.12@400                                               | 1000                  |     |
| B-CoFe LDH                                                                    | 1M KOH + Seawater    | 310@100                                              | 100                   | --                                                   | --                    | --                                                     | --                    | S5  |
| N-CDs/NiFe LDH                                                                | 1M KOH + 0.5M NaCl   | 285@100                                              | 20                    | --                                                   | --                    | --                                                     | --                    | S6  |
|                                                                               | 1M KOH + seawater    | 340@100                                              | 20                    | --                                                   | --                    | --                                                     | --                    |     |
| CoPx  CoPx FeOOH                                                              | 1M KOH + Seawater    | 283@100                                              | 83                    | 190@100                                              | --                    | 1.71@100                                               | 80                    | S7  |
| CoFeZr LDH/NF                                                                 | 1M KOH + 0.5M NaCl   | 303@100                                              | 30                    | --                                                   | --                    | 1.66@15                                                | 20                    | S8  |
| NiMoN@ NiFeN                                                                  | 1M KOH + 0.5M NaCl   | 286@100                                              | --                    | --                                                   | --                    | 1.56@100                                               | 100                   | S9  |

|                       |                                                                         |                    |    |                    |    |          |      |                  |
|-----------------------|-------------------------------------------------------------------------|--------------------|----|--------------------|----|----------|------|------------------|
|                       | 1M KOH +<br>seawater                                                    | 307@100            |    | 82@100             | -- | 1.58@100 | 100  |                  |
| HCl-c-NiFe<br>LDH     | 1M KOH +<br>0.5M NaCl                                                   | 178@100            | -- | 175@100            | -- | 1.81@500 | 300  | S10              |
| NiFe-LDH              | 1M NaOH<br>+<br>Seawater                                                | 333@100            | -- | --                 | -- | --       | --   | S11              |
|                       | 1M NaOH<br>+ 0.5M<br>NaCl +<br>0.05M<br>Na <sub>2</sub> SO <sub>4</sub> | --                 | -- | --                 | -- | 2.3@400  | 1000 |                  |
| <b>MnFeCr<br/>LTH</b> | 1M KOH +<br>1M NaCl                                                     | 303@100<br>332@300 | -- | 277@100<br>362@300 | -- | --       | --   | <b>This work</b> |
|                       | 1M KOH +<br>seawater                                                    | 341@100<br>424@300 | 50 | 292@100<br>347@300 | 70 | 2.30@300 | 72   |                  |
|                       | 1M KOH +<br>seawater +<br>0.05M<br>Na <sub>2</sub> CO <sub>3</sub>      | --                 | -- | --                 | -- | 2.27@300 | 500  |                  |

**Table S10.** ICP-MS analysis of electrolytes after stability test of MFC-2 at current density of 300 mA cm<sup>-2</sup>.

| <b>Metals</b> | <b>Concentration in electrolyte solution (ppm)</b> |                                |
|---------------|----------------------------------------------------|--------------------------------|
|               | <b>In presence of inhibitor</b>                    | <b>In absence of inhibitor</b> |
| <b>Mn</b>     | <0.000                                             | 0.001                          |
| <b>Fe</b>     | <0.000                                             | <0.000                         |
| <b>Cr</b>     | 0.012                                              | 0.050                          |

**Table S11.** Calculated Gibbs free energy changes of OER under alkaline condition. The asterisk marks indicate the reactions via the Mars van Krevelen mechanism.

| Surfaces           | Intermediates |                |                |              |
|--------------------|---------------|----------------|----------------|--------------|
|                    | $\Delta G_1$  | $\Delta G_2$   | $\Delta G_3$   | $\Delta G_4$ |
| <b>MF(012)*</b>    | -0.964 eV     | <b>2.33 eV</b> | 0.969 eV       | -0.506 eV    |
| <b>MFC-2(012)*</b> | -1.46 eV      | <b>2.17 eV</b> | 1.34 eV        | -0.205 eV    |
| <b>FeOOH*</b>      | -0.175 eV     | <b>1.28 eV</b> | -0.343 eV      | 1.08 eV      |
| <b>MnOOH</b>       | 0.793 eV      | 0.0402 eV      | <b>1.59 eV</b> | -0.587 eV    |

## References

- S1 L. Yu, L. Wu, B. McElhenny, S. Song, D. Luo, F. Zhang, Y. Yu, S. Chen, Z. Ren, *Energy Environ. Sci.*, 2020, **13**, 3439-3446 .
- S2 F. Dionigi, T. Reier, Z. Pawolek, M. Gliech, P. Strasser, *ChemSusChem* 2016, **9**, 962–972.
- S3 S. Dresp, F. Dionigi, S. Loos, J.F. de Araujo, C. Spori, M. Gliech, H. Dau, P. Strasser, *Adv. Energy Mater.* 2018, **8**, 1800338.
- S4 Y. Kuang, M. J. Kenney, Y. Meng, W. Hung, Y. Liu, J. Huang, R. Prasanna, P. Li, Y. Li, L. Wang, M.C. Lin, M. D. McGehee, X. Sun, H. Dai, *Proc. Natl. Acad. Sci.* 2019, **116**, 6624–6629.
- S5 L. Wu, L. Yu, Q. Zhu, B. McElhenny, F. Zhang, C. Wu, X. Xing, J. Bao, S. Chen, Z. Ren, *Nano Energy* 2021, **83**, 105838.
- S6 P. Ding, H. Song, J. Chang, S. Lu, *Nano Research* 2022, **15**, 7063-7070.
- S7 L. Wu, L. Yu, B. McElhenny, X. Xing, D. Luo, F. Zhang, J. Bao, S. Chen, Z. Ren, *Appl. Catal. B Environ.* 2021, **294**, 120256.
- S8 W. Liu, K. Jiang, Y. Hu, Q. Li, Y. Deng, J. Bao, Y. Lei, *J. Colloid Interface Sci.* 2021, **604**, 767.
- S9 L. Yu, Q. Zhu, S.W. Song, B. McElhenny, D.Z. Wang, C.Z. Wu, Z.J. Qin, J.M. Bao, Y. Yu, S. Chen, Z. F. Ren, *Nat. Commun.* 2019, **10**, 5106.
- S10 S. Duan, Z. Liu, H. Zhuo, T. Wang, J. Liu, L. Wang, J. Liang, J. Han, Y. Huang, Q. Li, *Nanoscale* 2020, **12**, 21743-21749.
- S11 T. Ma, W. Xu, B. Li, X. Chen, J. Zhao, S. Wan, K. Jiang, S. Zhang, Z. Wang, Z. Tian, Z. Lu, L. Chen, *Angew. Chem. Int. Ed.*, 2021, **60**, 22922-22926.
